# Supplementary material
Source: PubMed Central journal article supplement (PMC8872978)
Supplement: 41366_2021_1022_MOESM1_ESM.pdf [file 41366_2021_1022_MOESM1_ESM.pdf]

**Supplementary table 1.** Characteristics of the study population in additional physical activity measures and medications

|                                      | Full sample   |               |                     | PRE-POST      |               |                     | PRE-PRE       |               |                     | POST-POST     |               |                     |
|--------------------------------------|---------------|---------------|---------------------|---------------|---------------|---------------------|---------------|---------------|---------------------|---------------|---------------|---------------------|
|                                      | BL            | FU            | Change <sup>a</sup> | BL            | FU            | Change <sup>a</sup> | BL            | FU            | Change <sup>a</sup> | BL            | FU            | Change <sup>a</sup> |
| <b>Self-reported PA [n]</b>          | 274           | 298           | 274                 | 143           | 149           | 143                 | 53            | 56            | 53                  | 78            | 93            | 78                  |
| SR-PA [MET-h/day]                    | 5.15<br>±4.38 | 4.91<br>±3.93 | -0.23<br>±3.72      | 5.25<br>±4.54 | 4.90<br>±3.85 | -0.39<br>3.71       | 5.86<br>±4.91 | 5.81<br>±3.90 | -0.10<br>±3.26      | 4.49<br>±3.59 | 4.40<br>±4.00 | -0.03<br>±4.05      |
| <b>Accelerometer-measured PA [n]</b> | 235           | 283           | 222                 | 134           | 141           | 126                 | 43            | 55            | 43                  | 58            | 87            | 53                  |
| ACC-MVPA [min/day]                   | 67.3<br>±29.2 | 62.8<br>±27.2 | -3.9<br>±23.0       | 65.7<br>±32.5 | 62.7<br>±27.6 | -3.1<br>±25.3       | 72.6<br>±23.0 | 68.0<br>±25.9 | -5.4<br>±20.8       | 67.3<br>±25.1 | 59.8<br>±27.2 | -4.6<br>±19.0       |
| <b>Medications<sup>b</sup></b>       |               |               |                     |               |               |                     |               |               |                     |               |               |                     |
| Use of antihypertensives             |               |               |                     |               |               |                     |               |               |                     |               |               |                     |
| Non-user                             | 86 (238)      | 78 (233)      |                     | 90 (129)      | 79 (117)      |                     | 83 (44)       | 80 (45)       |                     | 82 (65)       | 76 (71)       |                     |
| User                                 | 14 (38)       | 22 (65)       |                     | 10 (15)       | 21 (32)       |                     | 17 (9)        | 20 (11)       |                     | 18 (14)       | 24 (22)       |                     |
| Use of lipid modifying agents        |               |               |                     |               |               |                     |               |               |                     |               |               |                     |
| Non-user                             | 97 (267)      | 92 (274)      |                     | 98 (141)      | 92 (140)      |                     | 94 (50)       | 89 (50)       |                     | 96 (76)       | 90 (84)       |                     |
| User                                 | 3 (9)         | 8 (24)        |                     | 2 (3)         | 8 (9)         |                     | 6 (3)         | 11 (6)        |                     | 4 (3)         | 10 (9)        |                     |
| Use of thyroid therapy               |               |               |                     |               |               |                     |               |               |                     |               |               |                     |
| Non-user                             | 91 (250)      | 88 (262)      |                     | 93 (134)      | 91 (136)      |                     | 87 (46)       | 82 (46)       |                     | 89(70)        | 86 (80)       |                     |
| User                                 | 9 (26)        | 12 (36)       |                     | 7 (10)        | 9 (13)        |                     | 13 (7)        | 18 (10)       |                     | 11 (9)        | 14 (13)       |                     |

Data are mean ± SD unless otherwise specified. PRE-POST, participants who were pre- or perimenopausal at baseline and postmenopausal at follow-up; PRE-PRE, participants who were pre- or perimenopausal in both measurements; POST-POST, participants who were postmenopausal already at baseline; BL, baseline measurement; FU, follow-up measurement; PA, physical activity; SR-PA, self-report physical activity questionnaire; MET; metabolic equivalent; ACC-MVPA, accelerometer-measured daily moderate-to-vigorous physical activity. <sup>a</sup> For participants with baseline and follow-up measurement, <sup>b</sup> Data are % (n).

**Supplementary table 2.** Pooled fixed effect estimates for blood-based biomarkers with self-reported physical activity (n=298)

|                              | Total cholesterol<br>[mmol/l] |                | HDL-C<br>[mmol/l] |                | LDL-C<br>[mmol/l] |                | Glucose<br>[mmol/l] |                | Triglycerides<br>[mmol/l] |                |
|------------------------------|-------------------------------|----------------|-------------------|----------------|-------------------|----------------|---------------------|----------------|---------------------------|----------------|
|                              | B                             | 95% CI         | B                 | 95% CI         | B                 | 95% CI         | B                   | 95% CI         | B                         | 95% CI         |
| Intercept (PRE-POST)         | 5.31***                       | [5.11, 5.51]   | 1.61***           | [1.52, 1.71]   | 3.15***           | [2.98, 3.33]   | 5.16***             | [5.04, 5.27]   | 1.18***                   | [1.05, 1.32]   |
| <b>Main effects</b>          |                               |                |                   |                |                   |                |                     |                |                           |                |
| Group                        |                               |                |                   |                |                   |                |                     |                |                           |                |
| PRE-POST (ref.)              | -                             |                | -                 |                | -                 |                | -                   |                | -                         |                |
| PRE-PRE                      | 0.03                          | [-0.27, 0.34]  | -0.05             | [-0.20, 0.10]  | 0.05              | [-0.22, 0.32]  | 0.05                | [-0.12, 0.22]  | 0.03                      | [-0.18, 0.24]  |
| POST-POST                    | 0.31*                         | [0.06, 0.56]   | 0.20**            | [0.07, 0.32]   | 0.18              | [-0.04, 0.40]  | 0.05                | [-0.09, 0.19]  | 0.03                      | [-0.14, 0.21]  |
| SR-PA [MET-h/day]            | -0.02*                        | [-0.05, -0.00] | 0.02***           | [0.01, 0.03]   | -0.03*            | [-0.05, -0.01] | -0.01               | [-0.02, 0.00]  | -0.02**                   | [-0.04, -0.01] |
| Age at baseline [year]       | 0.03                          | [-0.02, 0.09]  | -0.00             | [-0.03, 0.03]  | 0.02              | [-0.03, 0.08]  | -0.00               | [-0.03, 0.03]  | 0.03                      | [-0.01, 0.07]  |
| Use of hormonal preparations |                               |                |                   |                |                   |                |                     |                |                           |                |
| Non-user (ref.)              | -                             |                | -                 |                | -                 |                | -                   |                | -                         |                |
| Progestogen                  | -0.14                         | [-0.32, 0.04]  | -0.12**           | [-0.20, -0.03] | -0.06             | [-0.21, 0.10]  | 0.06                | [-0.05, 0.16]  | -0.02                     | [-0.14, 0.10]  |
| Estrogen                     | -0.24                         | [-0.73, 0.25]  | 0.20              | [-0.02, 0.42]  | -0.25             | [-0.67, 0.18]  | 0.04                | [-0.26, 0.33]  | -0.22                     | [-0.53, 0.10]  |
| Progestogen + Estrogen       | -0.17                         | [-0.42, 0.07]  | -0.08             | [-0.19, 0.03]  | -0.15             | [-0.36, 0.06]  | -0.18*              | [-0.33, -0.04] | -0.02                     | [-0.18, 0.12]  |
| Time (PRE-POST)              | 0.62***                       | [0.43, 0.82]   | 0.28***           | [0.19, 0.36]   | 0.54***           | [0.38, 0.71]   | 0.15*               | [0.03, 0.28]   | 0.23***                   | [0.10, 0.35]   |
| <b>Interactions</b>          |                               |                |                   |                |                   |                |                     |                |                           |                |
| Time × Group                 |                               |                |                   |                |                   |                |                     |                |                           |                |
| Time × PRE-POST (ref.)       | -                             |                | -                 |                | -                 |                | -                   |                | -                         |                |
| Time × PRE-PRE               | -0.25                         | [-0.52, 0.01]  | -0.08             | [-0.19, 0.04]  | -0.18             | [-0.41, 0.05]  | -0.06               | [-0.22, 0.11]  | -0.14                     | [-0.31, 0.02]  |
| Time × POST-POST             | -0.41***                      | [-0.64, -0.19] | -0.16**           | [-0.25, -0.06] | -0.33***          | [-0.52, -0.13] | -0.22**             | [-0.36, -0.08] | -0.08                     | [-0.22, 0.06]  |
| Time × SR-PA                 | -0.00                         | [-0.03, 0.02]  | -0.01             | [-0.02, 0.00]  | -0.01             | [-0.03, 0.02]  | -0.00               | [-0.02, 0.01]  | -0.00                     | [-0.01, 0.02]  |

HDL-C, high-density lipoprotein cholesterol; LDL-C, low-density lipoprotein cholesterol; CI, Confidence interval; PRE-POST, participants who were pre- or perimenopausal at baseline and postmenopausal at follow-up (reference group); PRE-PRE, participants who were pre- or perimenopausal in both measurements; POST-POST, participants who were postmenopausal already at baseline; SR-PA, self-reported physical activity; MET, metabolic equivalent; Time, from baseline to follow-up. \*  $p \leq 0.05$ , \*\*  $p \leq 0.01$ , \*\*\*  $p < 0.001$ .

**Supplementary table 3.** Pooled fixed effect estimates for blood-based lipid biomarkers without participants using lipid modifying agents (n=273)

|                              | Total cholesterol<br>[mmol/l] |                | HDL-C<br>[mmol/l] |                | LDL-C<br>[mmol/l] |                | Triglycerides<br>[mmol/l] |                |
|------------------------------|-------------------------------|----------------|-------------------|----------------|-------------------|----------------|---------------------------|----------------|
|                              | B                             | 95% CI         | B                 | 95% CI         | B                 | 95% CI         | B                         | 95% CI         |
| Intercept (PRE-POST)         | 5.46***                       | [5.12, 5.80]   | 1.54***           | [1.36, 1.73]   | 3.27***           | [2.98, 3.57]   | 1.22***                   | [1.01, 1.43]   |
| <b>Main effects</b>          |                               |                |                   |                |                   |                |                           |                |
| Group                        |                               |                |                   |                |                   |                |                           |                |
| PRE-POST (ref.)              | -                             |                | -                 |                | -                 |                | -                         |                |
| PRE-PRE                      | 0.05                          | [-0.26, 0.36]  | -0.04             | [-0.20, 0.12]  | 0.06              | [-0.21, 0.34]  | 0.03                      | [-0.16, 0.23]  |
| POST-POST                    | 0.34*                         | [0.09, 0.60]   | 0.19**            | [0.06, 0.32]   | 0.20              | [-0.02, 0.43]  | -0.01                     | [-0.17, 0.15]  |
| ACC-MAD [10 mg]              | -0.10*                        | [-0.20, -0.00] | 0.06*             | [0.01, 0.12]   | -0.10*            | [-0.19, -0.02] | -0.07*                    | [-0.13, -0.00] |
| Age at baseline [year]       | 0.03                          | [-0.03, 0.09]  | 0.00              | [-0.03, 0.04]  | 0.02              | [-0.04, 0.07]  | 0.03                      | [-0.01, 0.06]  |
| Use of hormonal preparations |                               |                |                   |                |                   |                |                           |                |
| Non-user (ref.)              | -                             |                | -                 |                | -                 |                | -                         |                |
| Progestogen                  | -0.14                         | [-0.31, 0.03]  | -0.12**           | [-0.21, -0.03] | -0.05             | [-0.20, 0.10]  | -0.00                     | [-0.11, 0.11]  |
| Estrogen                     | -0.07                         | [-0.53, 0.39]  | 0.17              | [-0.07, 0.42]  | -0.04             | [-0.43, 0.35]  | -0.15                     | [-0.45, 0.14]  |
| Progestogen + Estrogen       | -0.27*                        | [-0.49, -0.05] | -0.09             | [-0.21, 0.02]  | -0.23*            | [-0.42, -0.04] | -0.00                     | [-0.15, 0.14]  |
| Time (PRE-POST)              | 0.64***                       | [0.30, 0.98]   | 0.38***           | [0.20, 0.56]   | 0.54***           | [0.25, 0.84]   | 0.27*                     | [0.05, 0.49]   |
| <b>Interactions</b>          |                               |                |                   |                |                   |                |                           |                |
| Time × Group                 |                               |                |                   |                |                   |                |                           |                |
| Time × PRE-POST (ref.)       | -                             |                | -                 |                | -                 |                | -                         |                |
| Time × PRE-PRE               | -0.18                         | [-0.42, 0.06]  | -0.08             | [-0.21, 0.05]  | -0.14             | [-0.34, 0.07]  | -0.17*                    | [-0.32, -0.01] |
| Time × POST-POST             | -0.37***                      | [-0.57, -0.17] | -0.15**           | [-0.26, -0.04] | -0.28**           | [-0.45, -0.11] | -0.09                     | [-0.22, 0.04]  |
| Time × ACC-MAD               | 0.01                          | [-0.10, 0.12]  | -0.05             | [-0.10, 0.01]  | 0.01              | [-0.09, 0.10]  | -0.01                     | [-0.08, 0.06]  |

HDL-C, high-density lipoprotein cholesterol; LDL-C, low-density lipoprotein cholesterol; CI, Confidence interval; PRE-POST, participants who were pre- or perimenopausal at baseline and postmenopausal at follow-up (reference group); PRE-PRE, participants who were pre- or perimenopausal in both measurements; POST-POST, participants who were postmenopausal already at baseline; ACC-MAD, accelerometer-measured mean amplitude deviation; mg, milligravity (0.00981 m/s<sup>2</sup>); Time, from baseline to follow-up. \* p ≤ 0.05, \*\* p ≤ 0.01, \*\*\* p < 0.001.

**Supplementary table 4.** Pooled fixed effect estimates for body composition and anthropometrics with self-reported physical activity (n=298)

|                              | Total fat mass [kg] |                | Android fat mass [kg] |                | Waist circumference [cm] |                | Waist-to-hip ratio ×100 |                |
|------------------------------|---------------------|----------------|-----------------------|----------------|--------------------------|----------------|-------------------------|----------------|
|                              | B                   | 95% CI         | B                     | 95% CI         | B                        | 95% CI         | B                       | 95% CI         |
| Intercept (PRE-POST)         | 25.70***            | [24.20, 27.20] | 2.31***               | [2.14, 2.48]   | 84.18***                 | [82.38, 85.97] | 83.80***                | [82.57, 85.03] |
| <b>Main effects</b>          |                     |                |                       |                |                          |                |                         |                |
| Group                        |                     |                |                       |                |                          |                |                         |                |
| PRE-POST (ref.)              | -                   |                | -                     |                | -                        |                | -                       |                |
| PRE-PRE                      | 0.51                | [-2.23, 3.64]  | 0.04                  | [-0.26, 0.35]  | 2.02                     | [-1.21, 5.24]  | 1.12                    | [-0.88, 3.11]  |
| POST-POST                    | -0.96               | [-3.22, 1.30]  | -0.08                 | [-0.33, 0.18]  | -1.01                    | [-3.68, 1.67]  | -0.31                   | [-2.00, 1.38]  |
| SR-PA [MET-h/day]            | -0.25***            | [-0.36, -0.14] | -0.03***              | [-0.04, -0.02] | -0.28***                 | [-0.43, -0.13] | -0.29***                | [-0.44, -0.14] |
| Age at baseline [year]       | 0.40                | [-0.17, 0.97]  | 0.04                  | [-0.02, 0.11]  | 0.62                     | [-0.05, 1.28]  | 0.32                    | [-0.07, 0.71]  |
| Use of hormonal preparations |                     |                |                       |                |                          |                |                         |                |
| Non-user (ref.)              | -                   |                | -                     |                | -                        |                | -                       |                |
| Progestogen                  | -0.70               | [-1.62, 0.22]  | -0.07                 | [-0.19, 0.04]  | -0.36                    | [-1.53, 0.81]  | -0.04                   | [-1.08, 1.01]  |
| Estrogen                     | 0.23                | [-1.80, 2.26]  | -0.02                 | [-0.28, 0.24]  | 0.19                     | [-2.49, 2.88]  | 0.28                    | [-2.80, 2.25]  |
| Progestogen + Estrogen       | -0.67               | [-1.84, 0.51]  | -0.15*                | [-0.29, -0.00] | 0.56                     | [-1.99, 0.88]  | 0.52                    | [-0.81, 1.84]  |
| Time (PRE-POST)              | 2.87***             | [2.10, 3.64]   | 0.39***               | [0.29, 0.49]   | 1.49**                   | [0.48, 2.50]   | 0.60                    | [-0.40, 1.60]  |
| <b>Interactions</b>          |                     |                |                       |                |                          |                |                         |                |
| Time × Group                 |                     |                |                       |                |                          |                |                         |                |
| Time × PRE-POST (ref.)       | -                   |                | -                     |                | -                        |                | -                       |                |
| Time × PRE-PRE               | -1.09*              | [-2.14, -0.04] | -0.12                 | [-0.26, 0.01]  | -0.05                    | [-1.36, 1.45]  | 0.70                    | [-0.71, 2.11]  |
| Time × POST-POST             | -1.15*              | [-2.05, -0.26] | -0.11                 | [-0.23, 0.01]  | -0.42                    | [-1.65, 0.82]  | 0.56                    | [-0.69, 1.80]  |
| Time × SR-PA                 | -0.09               | [-0.20, 0.02]  | -0.01                 | [-0.02, 0.00]  | -0.07                    | [-0.22, 0.08]  | 0.15                    | [-0.00, 0.31]  |

CI, Confidence interval; PRE-POST, participants who were pre- or perimenopausal at baseline and postmenopausal at follow-up (reference group); PRE-PRE, participants who were pre- or perimenopausal in both measurements; POST-POST, participants who were postmenopausal already at baseline; SR-PA, self-reported physical activity; MET, metabolic equivalent; Time, from baseline to follow-up. \*  $p \leq 0.05$ , \*\*  $p \leq 0.01$ , \*\*\*  $p < 0.001$ .

**Supplementary table 5.** Pooled fixed effect estimates for blood pressure with self-reported physical activity (n=298)

|                              | Systolic blood pressure<br>[mmHg] |                  | Diastolic blood pressure<br>[mmHg] |                |
|------------------------------|-----------------------------------|------------------|------------------------------------|----------------|
|                              | B                                 | 95% CI           | B                                  | 95% CI         |
| Intercept (PRE-POST)         | 131.97***                         | [128.36, 135.57] | 84.59***                           | [82.66, 86.51] |
| <b>Main effects</b>          |                                   |                  |                                    |                |
| Group                        |                                   |                  |                                    |                |
| PRE-POST (ref.)              | -                                 |                  | -                                  |                |
| PRE-PRE                      | 1.50                              | [-4.21, 7.22]    | 1.16                               | [-1.99, 4.31]  |
| POST-POST                    | -1.98                             | [-6.81, 2.85]    | -0.11                              | [-2.78, 2.56]  |
| SR-PA [MET-h/day]            | -0.03                             | [-0.43, 0.38]    | -0.14                              | [-0.34, 0.06]  |
| Age at baseline [year]       | 1.15*                             | [0.03, 2.27]     | 0.42                               | [-0.21, 1.06]  |
| Use of hormonal preparations |                                   |                  |                                    |                |
| Non-user (ref.)              | -                                 |                  | -                                  |                |
| Progestogen                  | 0.25                              | [-2.90, 3.41]    | -0.29                              | [-1.91, 1.32]  |
| Estrogen                     | -0.10                             | [-8.04, 7.85]    | -1.68                              | [-5.57, 2.22]  |
| Progestogen + Estrogen       | -5.50**                           | [-9.59, -1.42]   | -4.32***                           | [-6.35, -2.29] |
| Time (PRE-POST)              | 4.57**                            | [1.46, 7.69]     | -0.10                              | [-1.62, 1.42]  |
| <b>Interactions</b>          |                                   |                  |                                    |                |
| Time × Group                 |                                   |                  |                                    |                |
| Time × PRE-POST (ref.)       | -                                 |                  | -                                  |                |
| Time × PRE-PRE               | 0.74                              | [-3.58, 5.06]    | -0.61                              | [-2.67, 1.46]  |
| Time × POST-POST             | -0.34                             | [-4.14, 3.46]    | -0.78                              | [-2.63, 1.06]  |
| Time × SR-PA                 | -0.41                             | [-0.85, 0.02]    | -0.17                              | [-0.39, 0.05]  |

CI, Confidence interval; PRE-POST, participants who were pre- or perimenopausal at baseline and postmenopausal at follow-up (reference group); PRE-PRE, participants who were pre- or perimenopausal in both measurements; POST-POST, participants who were postmenopausal already at baseline; SR-PA, self-reported physical activity; MET, metabolic equivalent; Time, from baseline to follow-up. \*  $p \leq 0.05$ , \*\*  $p \leq 0.01$ , \*\*\*  $p < 0.001$ .

**Supplementary table 6.** Pooled fixed effect estimates for blood pressure without participants using antihypertensives (n=230)

|                              | Systolic blood pressure<br>[mmHg] |                  | Diastolic blood pressure<br>[mmHg] |                |
|------------------------------|-----------------------------------|------------------|------------------------------------|----------------|
|                              | B                                 | 95% CI           | B                                  | 95% CI         |
| Intercept (PRE-POST)         | 126.67***                         | [120.42, 132.90] | 82.01***                           | [78.85, 85.17] |
| <b>Main effects</b>          |                                   |                  |                                    |                |
| Group                        |                                   |                  |                                    |                |
| PRE-POST (ref.)              | -                                 |                  | -                                  |                |
| PRE-PRE                      | -0.30                             | [-6.48, 5.88]    | 0.68                               | [-2.71, 4.08]  |
| POST-POST                    | -1.07                             | [-6.27, 4.13]    | 0.30                               | [-2.54, 3.15]  |
| ACC-MAD [10 mg]              | 0.66                              | [-1.15, 2.46]    | -0.07                              | [-0.95, 0.82]  |
| Age at baseline [year]       | 0.69                              | [-0.55, 1.92]    | 0.16                               | [-0.53, 0.86]  |
| Use of hormonal preparations |                                   |                  |                                    |                |
| Non-user (ref.)              | -                                 |                  | -                                  |                |
| Progestogen                  | 0.71                              | [-2.60, 4.03]    | -0.10                              | [-1.75, 1.54]  |
| Estrogen                     | 1.51                              | [-6.12, 9.15]    | -1.09                              | [-4.73, 2.55]  |
| Progestogen + Estrogen       | -4.28                             | [-8.72, 0.16]    | -4.26***                           | [-6.43, -2.09] |
| Time (PRE-POST)              | 11.16**                           | [4.63, 17.70]    | 1.37                               | [-1.64, 4.39]  |
| <b>Interactions</b>          |                                   |                  |                                    |                |
| Time × Group                 |                                   |                  |                                    |                |
| Time × PRE-POST (ref.)       | -                                 |                  | -                                  |                |
| Time × PRE-PRE               | 0.98                              | [-3.58, 5.55]    | -1.03                              | [-3.13, 1.08]  |
| Time × POST-POST             | -1.28                             | [-5.19, 2.63]    | -1.71                              | [-3.52, 0.10]  |
| Time × ACC-MAD               | -2.52*                            | [-4.64, -0.38]   | -0.48                              | [-1.46, 0.51]  |

CI, Confidence interval; PRE-POST, participants who were pre- or perimenopausal at baseline and postmenopausal at follow-up (reference group); PRE-PRE, participants who were pre- or perimenopausal in both measurements; POST-POST, participants who were postmenopausal already at baseline; ACC-MAD, accelerometer-measured mean amplitude deviation; mg, milligravity (0.00981 m/s<sup>2</sup>); Time, from baseline to follow-up. \* p ≤ 0.05, \*\* p ≤ 0.01, \*\*\* p < 0.001.

**Supplementary table 7.** Pooled fixed effect estimates for number of metabolic syndrome risk factors with self-reported physical activity (n=298)

|                              | <b>Number of metabolic syndrome risk factors</b> |              |
|------------------------------|--------------------------------------------------|--------------|
|                              | exp(B)                                           | 95% CI       |
| Intercept (PRE-POST)         | 1.41**                                           | [1.11, 1.80] |
| <b>Main effects</b>          |                                                  |              |
| Group                        |                                                  |              |
| PRE-POST (ref.)              | -                                                |              |
| PRE-PRE                      | 1.33                                             | [0.95, 1.85] |
| POST-POST                    | 0.92                                             | [0.69, 1.22] |
| SR-PA [MET-h/day]            | 0.94*                                            | [0.91, 0.97] |
| Age at baseline [year]       | 1.07*                                            | [1.01, 1.14] |
| Use of hormonal preparations |                                                  |              |
| Non-user (ref.)              | -                                                |              |
| Progestogen                  | 0.99                                             | [0.79, 1.23] |
| Estrogen                     | 0.68                                             | [0.34, 1.39] |
| Progestogen + Estrogen       | 0.71                                             | [0.50, 1.02] |
| Time (PRE-POST)              | 1.20                                             | [0.92, 1.58] |
| <b>Interactions</b>          |                                                  |              |
| Time × Group                 |                                                  |              |
| Time × PRE-POST (ref.)       | -                                                |              |
| Time × PRE-PRE               | 0.79                                             | [0.54, 1.16] |
| Time × POST-POST             | 0.94                                             | [0.68, 1.30] |
| Time × SR-PA                 | 0.99                                             | [0.95, 1.03] |

CI, Confidence interval; PRE-POST, participants who were pre- or perimenopausal at baseline and postmenopausal at follow-up (reference group); PRE-PRE, participants who were pre- or perimenopausal in both measurements; POST-POST, participants who were postmenopausal already at baseline; SR-PA, self-reported physical activity; MET, metabolic equivalent; Time, from baseline to follow-up; \*  $p \leq 0.05$ , \*\*  $p \leq 0.01$ , \*\*\*  $p < 0.001$ .

**Supplementary table 8.** Pooled fixed effect estimates for number of metabolic syndrome risk factors without participants using lipid modifying agents or antihypertensives (n=220)

|                              | <b>Number of metabolic syndrome risk factors</b> |              |
|------------------------------|--------------------------------------------------|--------------|
|                              | exp(B)                                           | 95% CI       |
| Intercept (PRE-POST)         | 1.27                                             | [0.73, 2.20] |
| <b>Main effects</b>          |                                                  |              |
| Group                        |                                                  |              |
| PRE-POST (ref.)              | -                                                |              |
| PRE-PRE                      | 1.29                                             | [0.84, 1.98] |
| POST-POST                    | 0.95                                             | [0.65, 1.37] |
| ACC-MAD [10 mg]              | 0.88                                             | [0.74, 1.04] |
| Age at baseline [year]       | 1.04                                             | [0.96, 1.12] |
| Use of hormonal preparations |                                                  |              |
| Non-user (ref.)              | -                                                |              |
| Progestogen                  | 0.98                                             | [0.74, 1.30] |
| Estrogen                     | 0.91                                             | [0.38, 2.15] |
| Progestogen + Estrogen       | 0.69                                             | [0.44, 1.08] |
| Time (PRE-POST)              | 1.57                                             | [0.80, 3.11] |
| <b>Interactions</b>          |                                                  |              |
| Time × Group                 |                                                  |              |
| Time × PRE-POST (ref.)       | -                                                |              |
| Time × PRE-PRE               | 0.77                                             | [0.48, 1.26] |
| Time × POST-POST             | 0.96                                             | [0.63, 1.47] |
| Time × ACC-MAD               | 0.88                                             | [0.69, 1.11] |

CI, Confidence interval; PRE-POST, participants who were pre- or perimenopausal at baseline and postmenopausal at follow-up (reference group); PRE-PRE, participants who were pre- or perimenopausal in both measurements; POST-POST, participants who were postmenopausal already at baseline; ACC-MAD, accelerometer-measured mean amplitude deviation; mg, milligravity (0.00981 m/s<sup>2</sup>); Time, from baseline to follow-up. \* p ≤ 0.05, \*\* p ≤ 0.01, \*\*\* p < 0.001.
